# Supplementary material for: Transcriptome Profiling Identifies Ribosome Biogenesis as a Target of Alcohol Teratogenicity and Vulnerability during Early Embryogenesis
Source: PLOS journal article supplement (doi:10.1371/journal.pone.0169351), 2017-01-03
Supplement: S2 (10.1371/journal.pone.0169351.s002) [file journal.pone.0169351.s002]

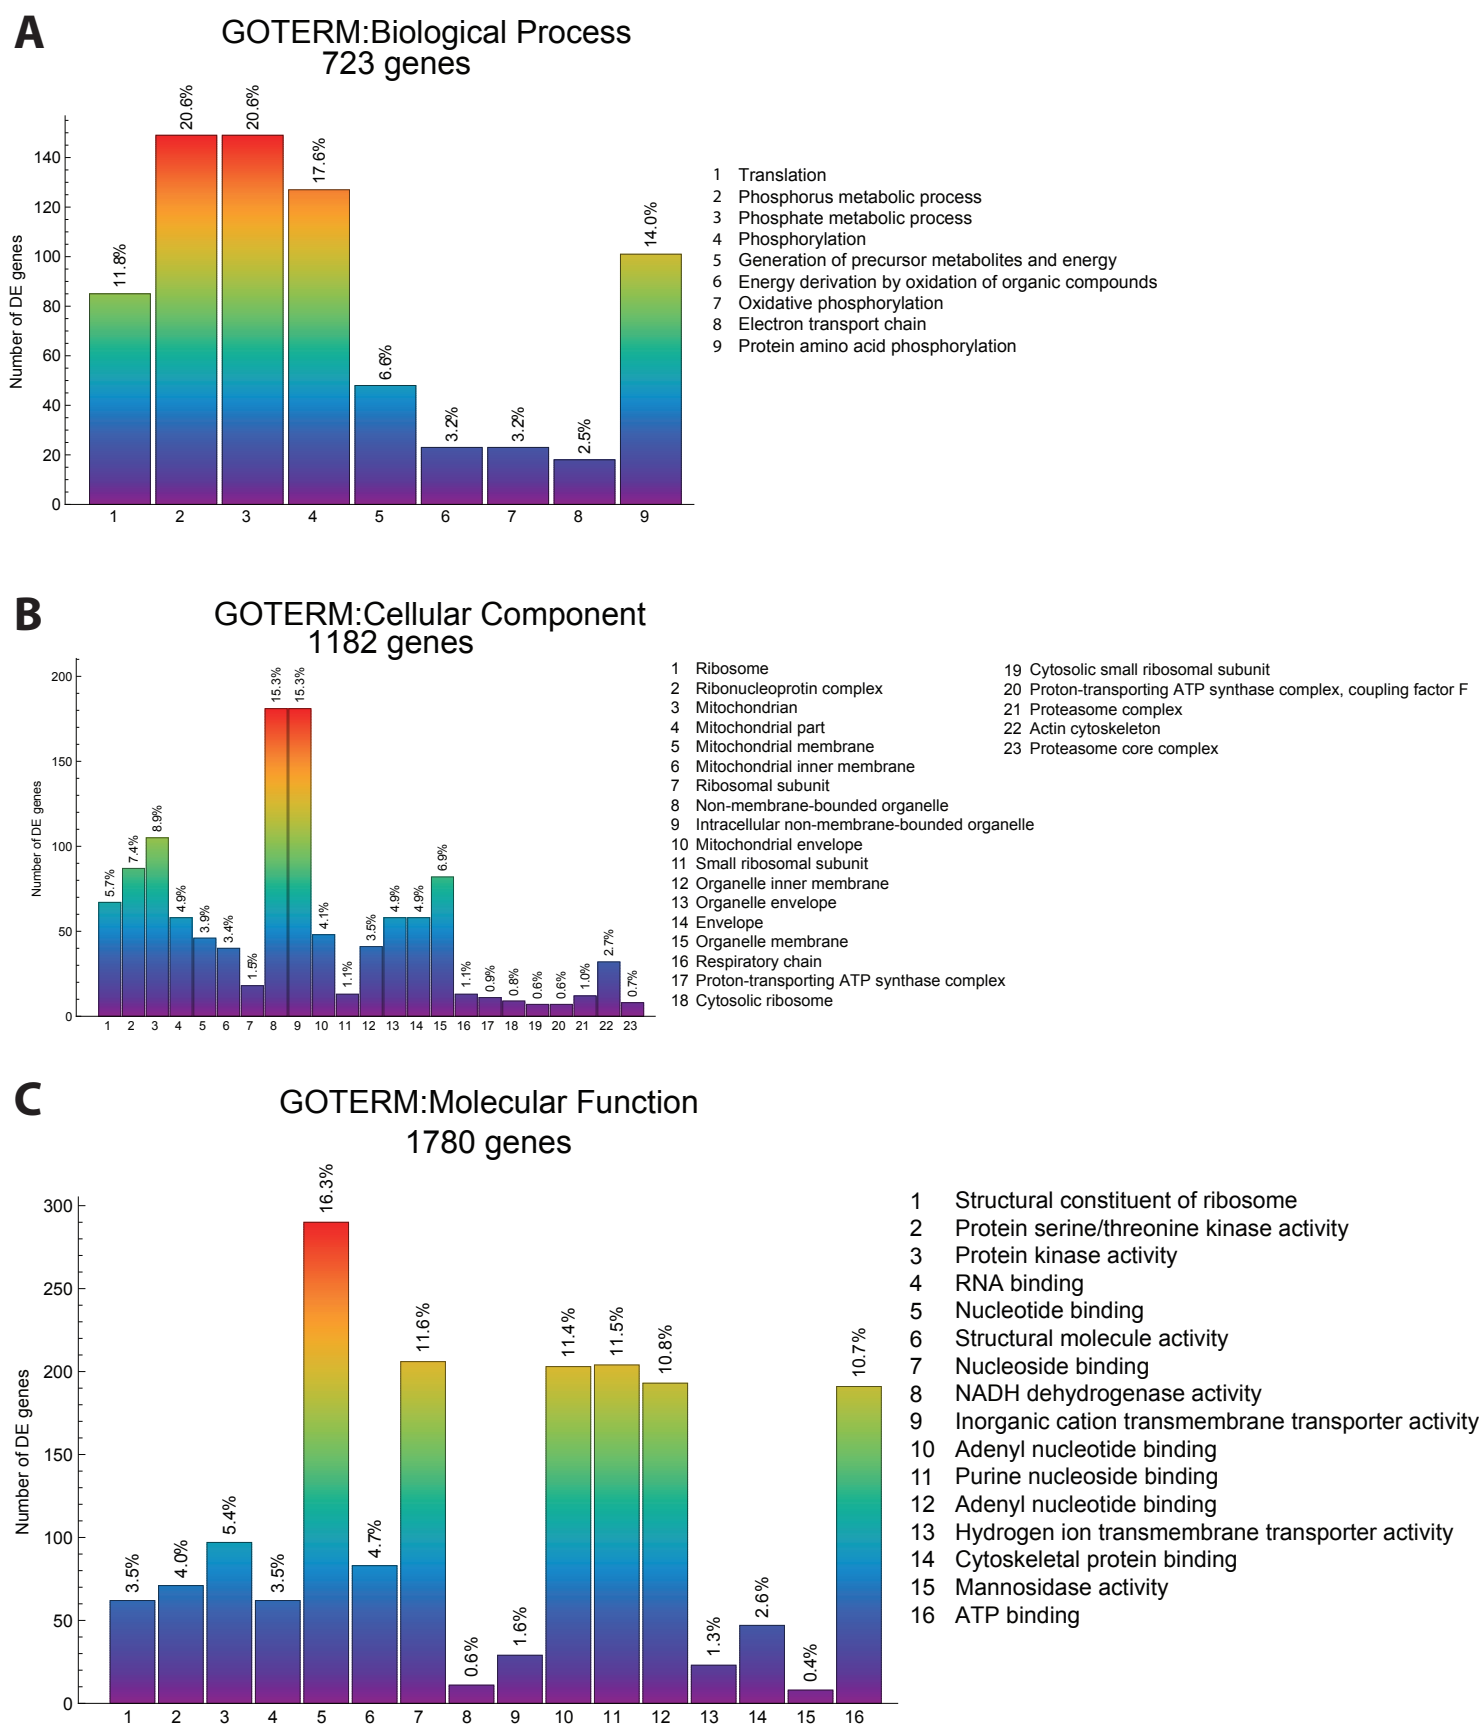

**Fig S2. Gene ontologies (GO) having significant differential enrichment in alcohol-exposed neuroprogenitors.** (A-C) For each ontology, the number of represented gene transcripts for each term is indicated. For each term category, the percentage of transcripts is indicated. (A) Biological Processes (B) Cellular Component (C) Molecular Function.
